# Supplementary material
Source: MDPI journal article supplement (https://www.mdpi.com/2304-6740/5/4/75)
Supplement: s1 [file s1]

---

## Supporting information

# Synthesis of 1,3-diols from isobutene and HCHO via Prins condensation-hydrolysis using CeO<sub>2</sub> catalysts: effects of crystal plane and oxygen vacancy

Zhixin Zhang,<sup>a</sup> Yehong Wang,<sup>a</sup> Jianmin Lu,<sup>a</sup> Min Wang,<sup>a</sup> Jian Zhang,<sup>a</sup>

Xuebin Liu,<sup>b</sup> and Feng Wang<sup>\*a</sup>

<sup>a</sup> State Key Laboratory of Catalysis, Dalian National Laboratory for Clean Energy, Dalian Institute of Chemical Physics, Chinese Academy of Sciences, Dalian 116023, P.R. China

<sup>b</sup> Energy Innovation Laboratory, BP Office (Dalian Institute of Chemical Physics), Dalian 116023, P.R. China

\*Corresponding author. Tel: +86-411-84379762; Fax: +86-411-84379762; E-mail: [wangfeng@dicp.ac.cn](mailto:wangfeng@dicp.ac.cn)

---

### Catalyst phase analysis by powder X-ray diffraction

Powder X-ray diffraction patterns were conducted with a PANalytical X-Pert PRO diffractometer using Cu-K $\alpha$  radiation at 40 kV and 20 mA. Continuous scans are collected over a  $2\theta$  range of 5 to 80°.

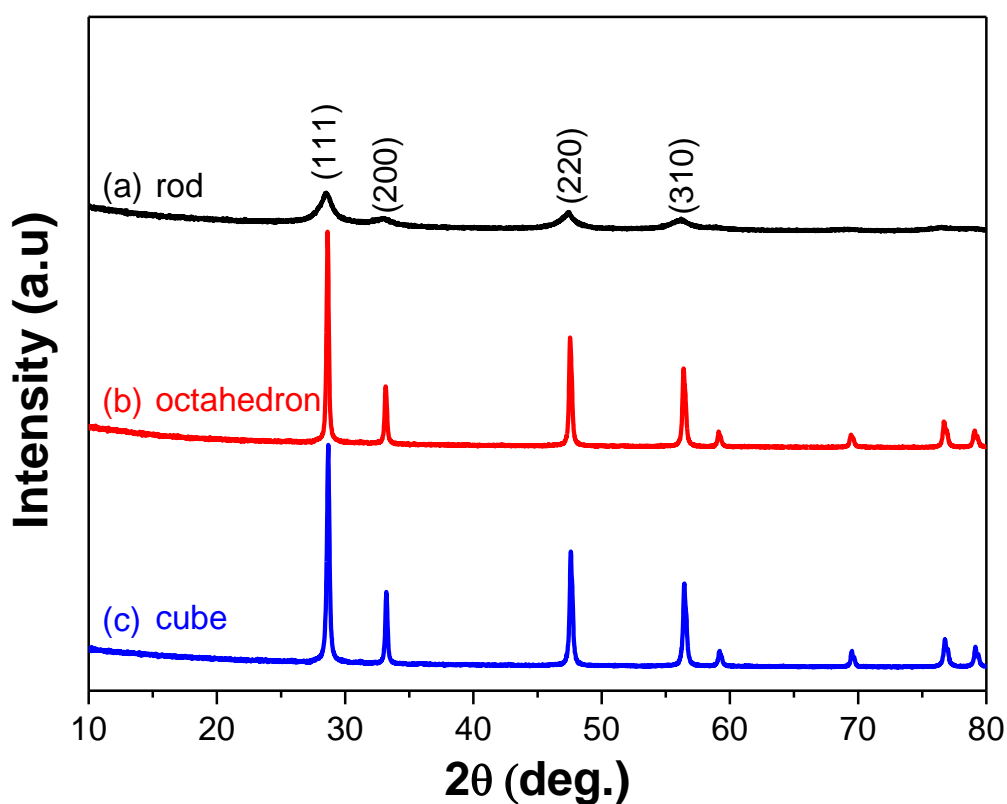

**Figure S1.** XRD patterns of CeO<sub>2</sub> with different morphologies

### Catalyst morphologies observed by transmission electron microscopy (TEM) and high-resolution TEM (HRTEM) microscopy

TEM and HRTEM images were recorded on a JEOL-2100F electron microscopy operating at 200 kV.

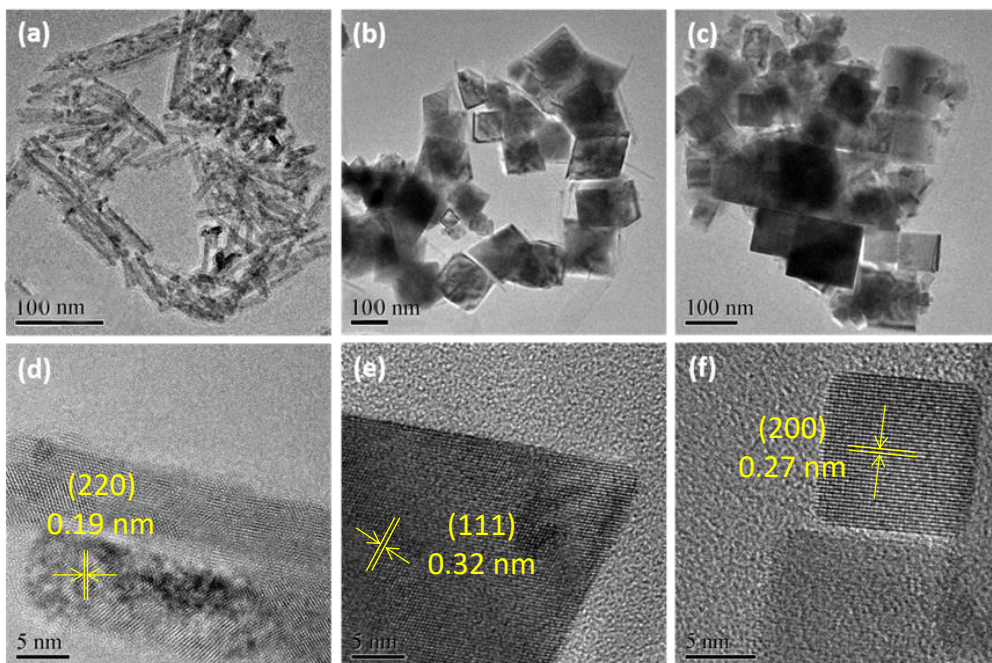

**Figure S2.** TEM of (a) CeO<sub>2</sub>-rod, (b) CeO<sub>2</sub>-octahedron, and (c) CeO<sub>2</sub>-cube and HRTEM of (d) CeO<sub>2</sub>-rod, (e) CeO<sub>2</sub>-octahedron, and (f) CeO<sub>2</sub>-cube.

### Raman Characterization

Raman spectra were recorded on a micro-Raman spectrometer (Renishaw) equipped with a CCD detector using a He/Ne laser with a wavelength of 532 nm. The excitation laser was selected due to its preference for signals related to the surface layer species of the samples.

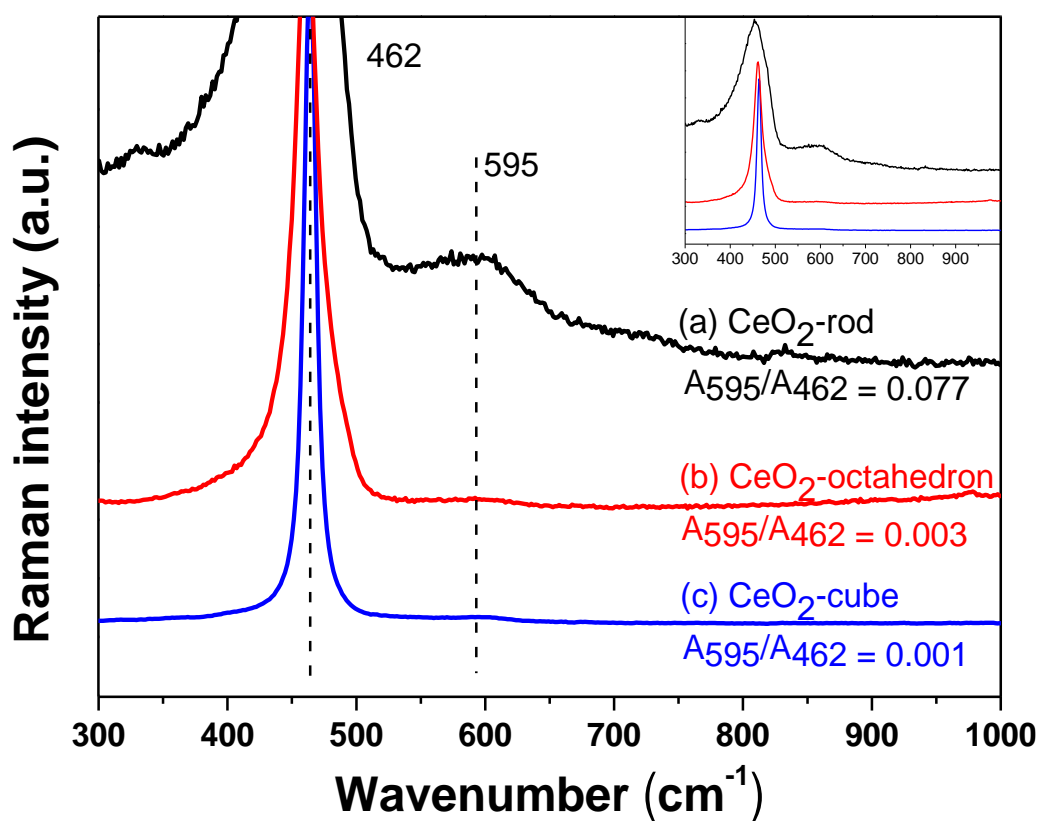

**Figure S3.** Raman spectra of (a) CeO<sub>2</sub>-rod, (b) CeO<sub>2</sub>-octahedron, and (c) CeO<sub>2</sub>-cube

**Table S1.** Prins condensation-hydrolysis of isobutene with HCHO in water over CeO<sub>2</sub> with different morphologies

| Entry | Catalyst                     | Conv. (%) | Sel. (%) |    |        |
|-------|------------------------------|-----------|----------|----|--------|
|       |                              |           | 3        | 4  | Others |
| 1     | CeO <sub>2</sub> -rod        | 82        | 24       | 74 | 2      |
| 2     | CeO <sub>2</sub> -cube       | 82        | 25       | 74 | 1      |
| 3     | CeO <sub>2</sub> -octahedron | 78        | 31       | 68 | 1      |
| 4     | CeO <sub>2</sub>             | 69        | 35       | 63 | 2      |

Reaction conditions: 50 mg catalyst, 1.5 mL H<sub>2</sub>O, 0.21 mL HCHO (38 wt %), 3.0 g isobutene, 150 °C, 2 h.
